# Supplementary material for: Mutations in APOPT1, Encoding a Mitochondrial Protein, Cause Cavitating Leukoencephalopathy with Cytochrome c Oxidase Deficiency
Source: PubMed Central journal article supplement (PMC4157140; doi:10.1016/j.ajhg.2014.08.003), 2014-09-04
Supplement: mmc1.pdf [file mmc1.pdf]

The American Journal of Human Genetics, Volume 95

Supplemental Data

**Mutations in *APOPT1*, Encoding a Mitochondrial Protein, Cause Cavitating Leukoencephalopathy with Cytochrome c Oxidase Deficiency**

Laura Melchionda, Tobias B. Haack, Steven Hardy, Truus E.M. Abbink, Erika Fernandez-Vizarra, Eleonora Lamantea, Silvia Marchet, Lucia Morandi, Maurizio Moggio, Rosalba Carrozzo, Alessandra Torraco, Daria Diodato, Tim M. Strom, Thomas Meitinger, Pinar Tekturk, Zuhai Yapici, Fathiya Al-Murshedi, René Stevens, Richard J. Rodenburg, Costanza Lamperti, Anna Ardissonne, Isabella Moroni, Graziella Uziel, Holger Prokisch, Robert W. Taylor, Enrico Bertini, Marjo S. van der Knaap, Daniele Ghezzi, and Massimo Zeviani

## Supplemental Data

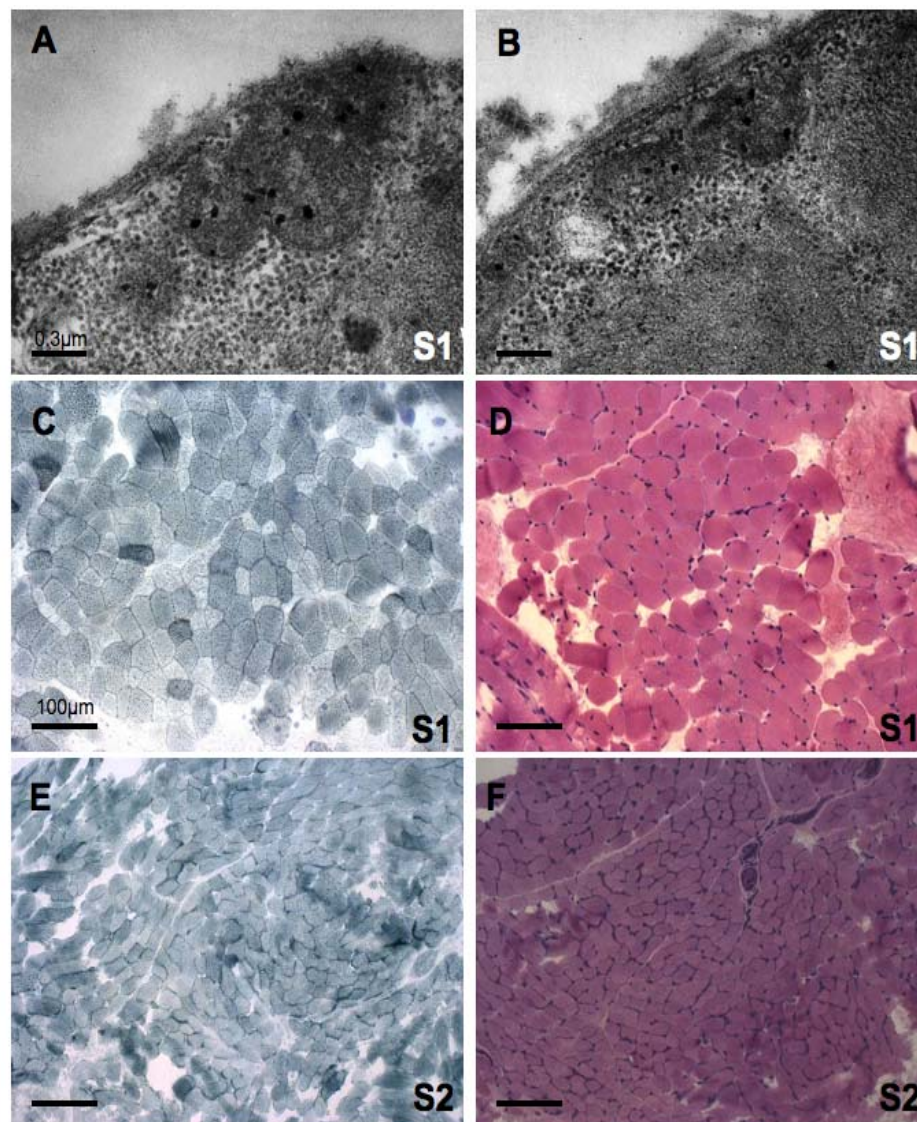

Figure S1

**Figure S1. Morphological findings in S1 and S2 muscle biopsies.**

Panels A and B: electron microscopy of S1 muscle showing mitochondria with cristae disarray and osmiophilic inclusions. Scale bar: 0.3  $\mu\text{m}$ .

Panel C: normal SDH histochemical reaction in S1 muscle. Scale bar: 100  $\mu\text{m}$ .

Panel D: normal haematoxylin and Eosin (H & E) reaction in S1 muscle. Scale bar: 100  $\mu\text{m}$ .

Panel E: normal SDH histochemical reaction in S2 muscle. Scale bar: 100  $\mu\text{m}$ .

Panel F: normal haematoxylin and Eosin (H & E) reaction in S2 muscle. Scale bar: 100  $\mu\text{m}$ .

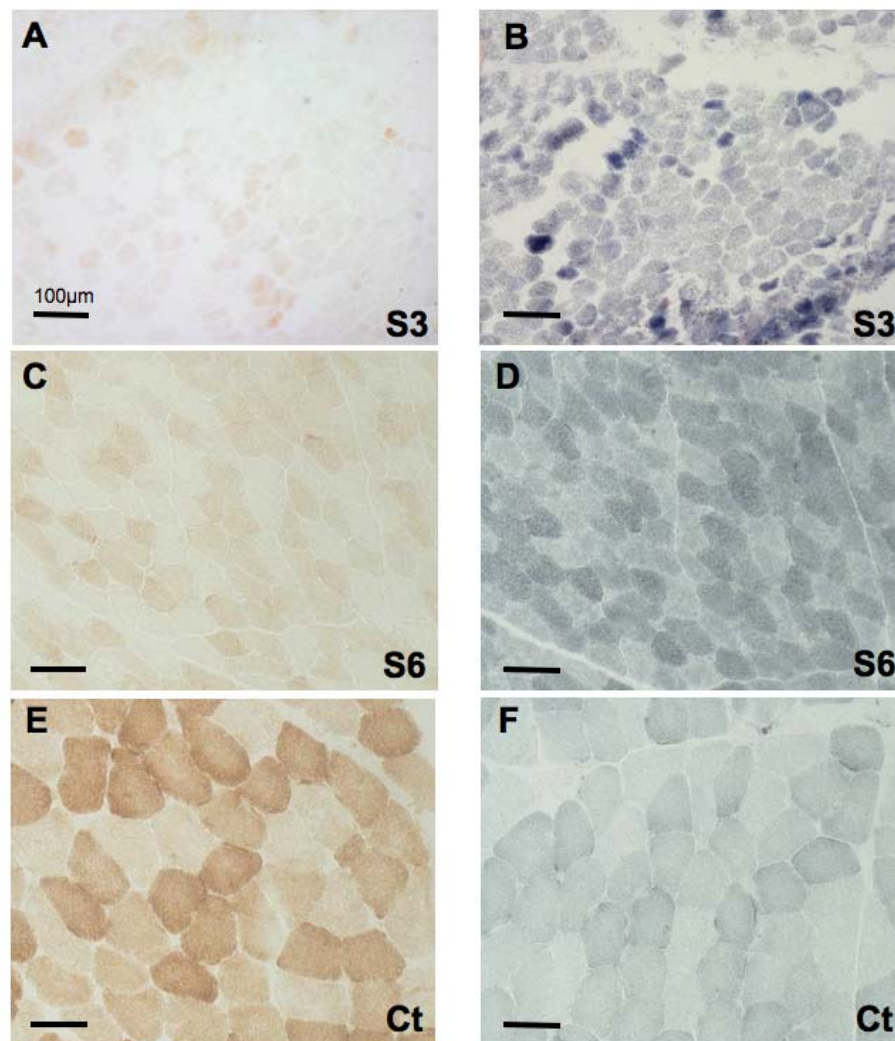

Figure S2

**Figure S2. Additional morphological findings in muscle biopsies.**

Panels A and B: COX and SDH/COX histochemical reactions in S3. Note the profound generalized decrease of the COX reaction. The SDH reaction is essentially normal. Scale bar: 100  $\mu$ m.

Panels C and D: COX and SDH histochemical reactions in S6. Note the profound generalized decrease of the COX reaction. The SDH reaction is essentially normal. Scale bar: 100  $\mu$ m.

Panels E and F: COX and SDH histochemical reactions in a control muscle (Ct). Scale bar: 100  $\mu$ m.

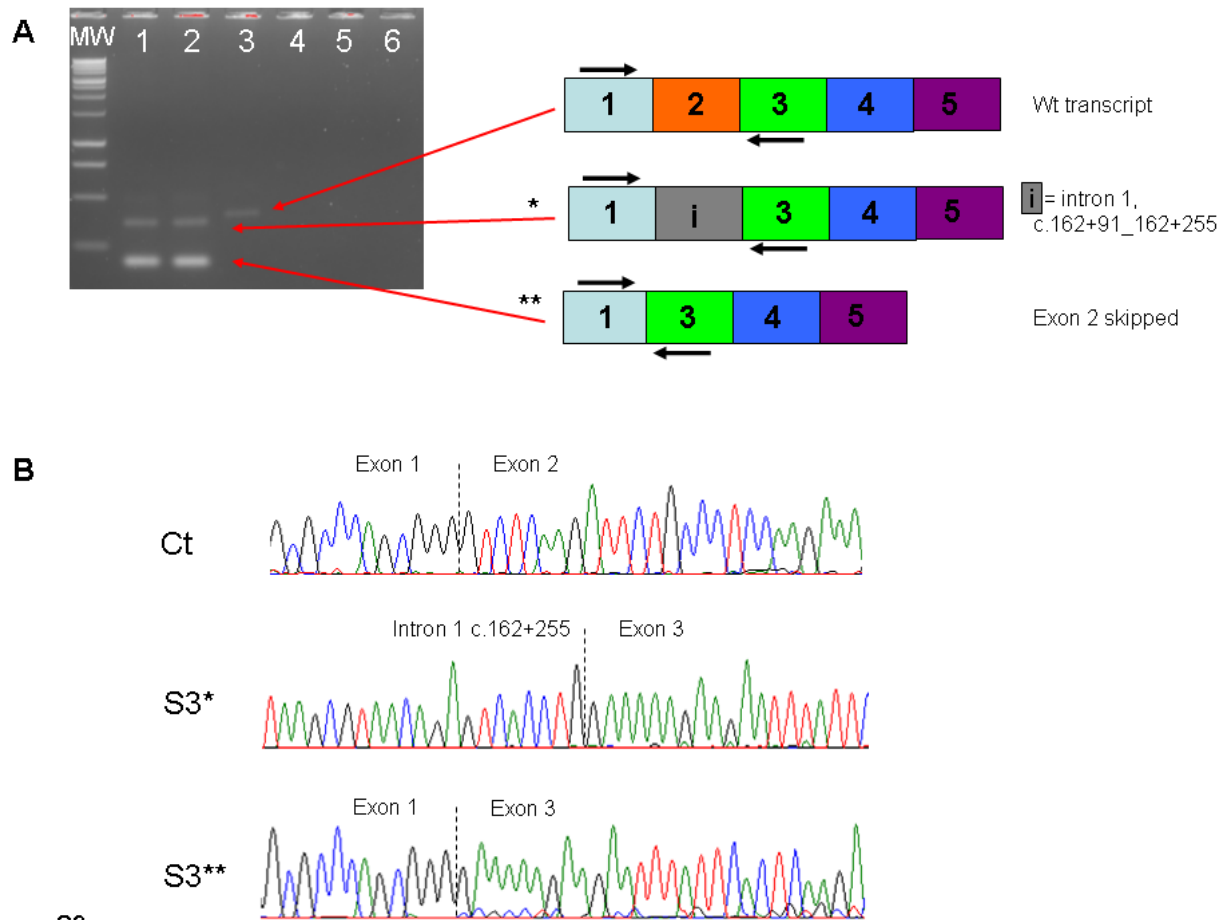

Figure S3

**Figure S3. Characterization of the c.163-1G>A APOPT1 mutation in S3.**

Panel A: Eth-Br stained bands corresponds to PCR amplifications and schematic representation of the splicing errors identified in of the *APOPT1* cDNA from S3. In the ethidium-bromide stained agarose gel, lanes 1 and 2 show two independent PCR amplifications of the mutant cDNA from S3 muscle. Lane 3 show the PCR amplification obtained from wt control muscle. Lanes 4, 5, 6 are negative controls (corresponding to genomic DNA, RT negative and PCR negatives, respectively). The interpretation of the band composition is given in a schematic representation of the transcripts amplified by the same primer pair flanking exon 2 (black arrows). In the mutant, two aberrant cDNA fragments are PCR amplified: a 317 bp band corresponding to the partial retention of intron 1 and the skipping of exon 2 (\*); a 153 bp band corresponding to the skipping of exon 2 (\*\*); a single 350 bp band containing exon 2 is amplified from the wt cDNA (Ct).

Panel B: the Sanger' sequence of the PCR bands confirm the scheme shown in Panel A.

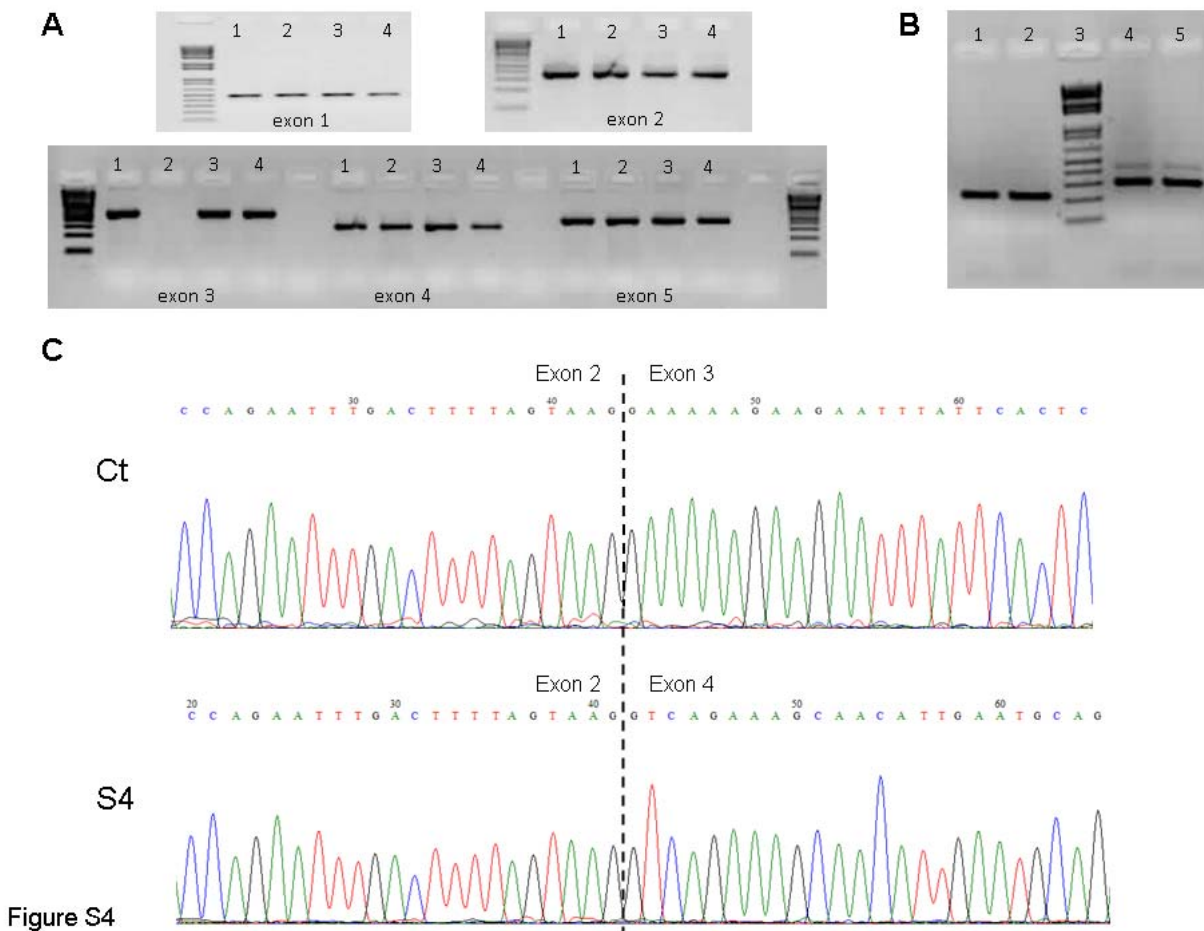

**Figure S4. Characterization of the Exon 3 deletion of *APOPT1* in S4.**

Panel A: PCR amplification of individual exons of *APOPT1* in control DNAs (lanes 1, 3), in S4 (lane 2) and S5 (lane 4). No band corresponding to exon 3 is amplified from S4 DNA. The other exons are normally amplified.

Panel B: PCR amplification of *APOPT1* cDNAs from S4 (pre-treated or not with cycloheximide; lanes 1 and 2 respectively) and control (pre-treated or not with cycloheximide; lanes 4 and 5 respectively) fibroblasts. Lane 3 is the DNA marker (1kb plus, Invitrogen). The band amplified from S4 corresponds to a cDNA fragment smaller than that amplified from the controls (see main text for details).

Panel C: Sequence analysis of the bands shown in Panel B confirmed the absence of Exon 3 in S4.

**A**

|                |    |                                                    |     |
|----------------|----|----------------------------------------------------|-----|
| C.elegans      | 50 | AREELNQWNSDFWAEHNQLFDRQKSDSFVERK-----QQELGRLEHVS   | 91  |
| D.melanogaster | 84 | KRIEVEAWNTDFWTKHNKRFEYEKEDFIR-----LHKESGT-SEVS     | 123 |
| D.rerio        | 92 | LRQETEDWNHEFWTNQNFTFNKEKEEYIQSQLSAKGLSERDDDGRKRTLS | 141 |
| G.gallus       | 77 | LREETQAWNQSFWARQNTAFQREKEEFYISRLKARGLEARDETGQKVTL  | 126 |
| M.musculus     | 87 | LRQETQEWNQFWAKQNLFSNKEKEEFYISRLQAKGAGLRTESGQRATLD  | 136 |
| R.norvegicus   | 86 | LRQETQEWNQFWAKQNLFSNKEKEEFYISRLQAKGSGPRTESGQRATLD  | 135 |
| B.taurus       | 85 | LRQETQEWNQFWADQNLTFHKEKEEFVRSRLKAKGLDLRTASGQKATLN  | 134 |
| C.lupus        | 54 | LRQETQEWNQFWANQNLTFRKEKEEFIHSRLKAKGLELRSGSGQKATLD  | 103 |
| M.mulatta      | 99 | LRQETQEWNQFWANQNLTFSSKEKEEFIHLRLKTKGLGLRTESGQKATLN | 148 |
| H.sapiens      | 99 | LRQETQEWNQFWANQNLTFSSKEKEEFIHSRLKTKGLGLRTESGQKATLN | 148 |

**B**

| Tools                  | Prediction              | Score  | Notes                                               |
|------------------------|-------------------------|--------|-----------------------------------------------------|
| <i>Polyphen2</i>       | Probably damaging       | 1.000  | Maximal deleteriousness=1                           |
| <i>SIFT</i>            | Affect protein function | 0      | probabilities < .05 are predicted to be deleterious |
| <i>Mutation Taster</i> | Disease causing         | 0.9999 | Probability of the prediction                       |
| <i>Pmut</i>            | Pathological            | 0.8360 | Maximal deleteriousness=1                           |

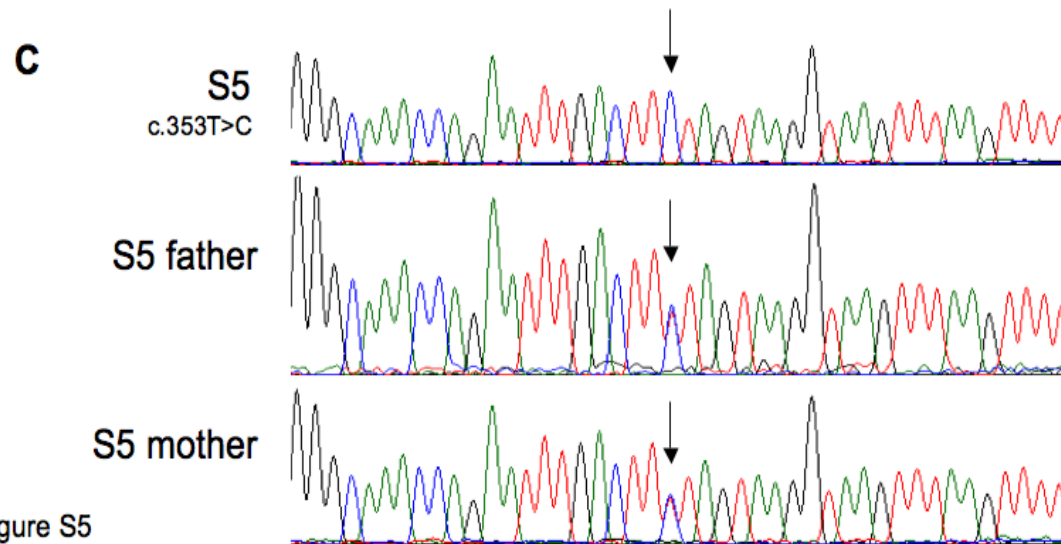

Figure S5

**Figure S5. Characterization of the APOPT1 Phe118Ser mutation in S5.**

Panel A: phylogenetic conservation of the Phe118 residue (highlighted in yellow) throughout species. Single letter aminoacid code.

Panel B: in silico analysis of pathogenicity using different prediction tools.

Panel C: Sequence analysis of the mutation containing *APOPT1* gene in S5 and parents. The c.353T>C change is indicated by an arrow.

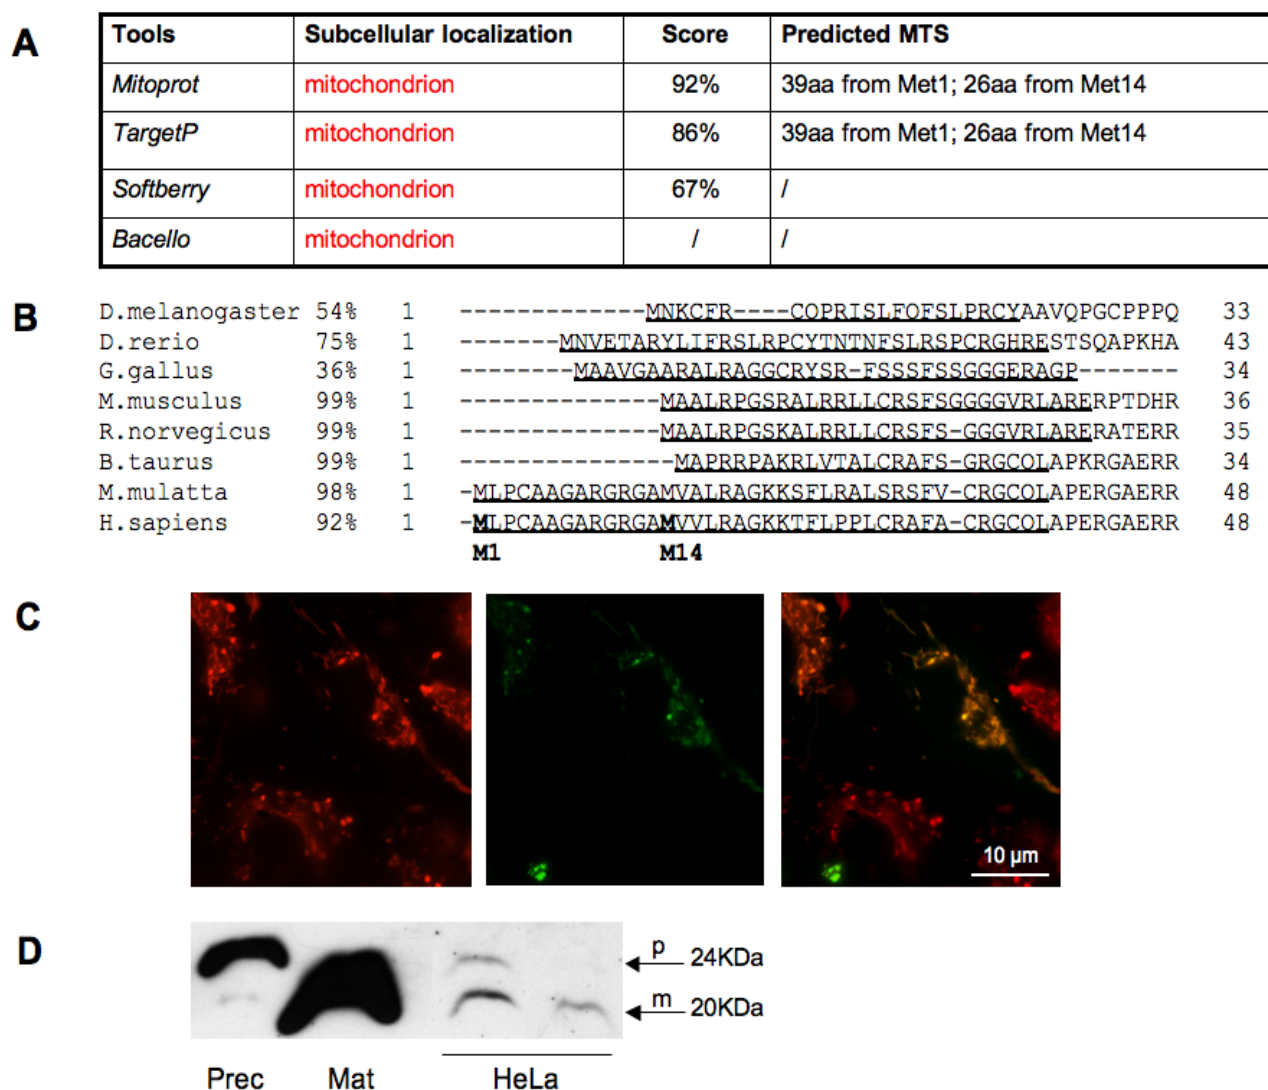

Figure S6

**Figure S6. Analysis of the APOPT1 N-terminal sequence**

Panel A: in silico prediction of subcellular localization using different prediction tools.

Panel B: phylogenetic analysis of the APOPT1 N-terminus. Methionine 1 (M1) is present only in humans and apes, whereas methionine 14 (M14) is invariant throughout the species analysed.

Panel C: the green fluorescent pattern obtained by transient expression of an APOPT1-HA protein starting from M1 (left), coincides with pattern obtained with Mitotracker red (center), producing a yellow pattern by overlay.

Panel D: APOPT1-HA (starting from M14) transiently expressed in HeLa cells is visualized as two faint bands, p and m (arrows) of 24 and 20 kDa, corresponding to the in vitro translated APOPT1 precursor (Prec) and mature (Mat) protein species. The mature protein is produced by cleaving off an approximately 4 kDa N-terminal MTS from the precursor species.

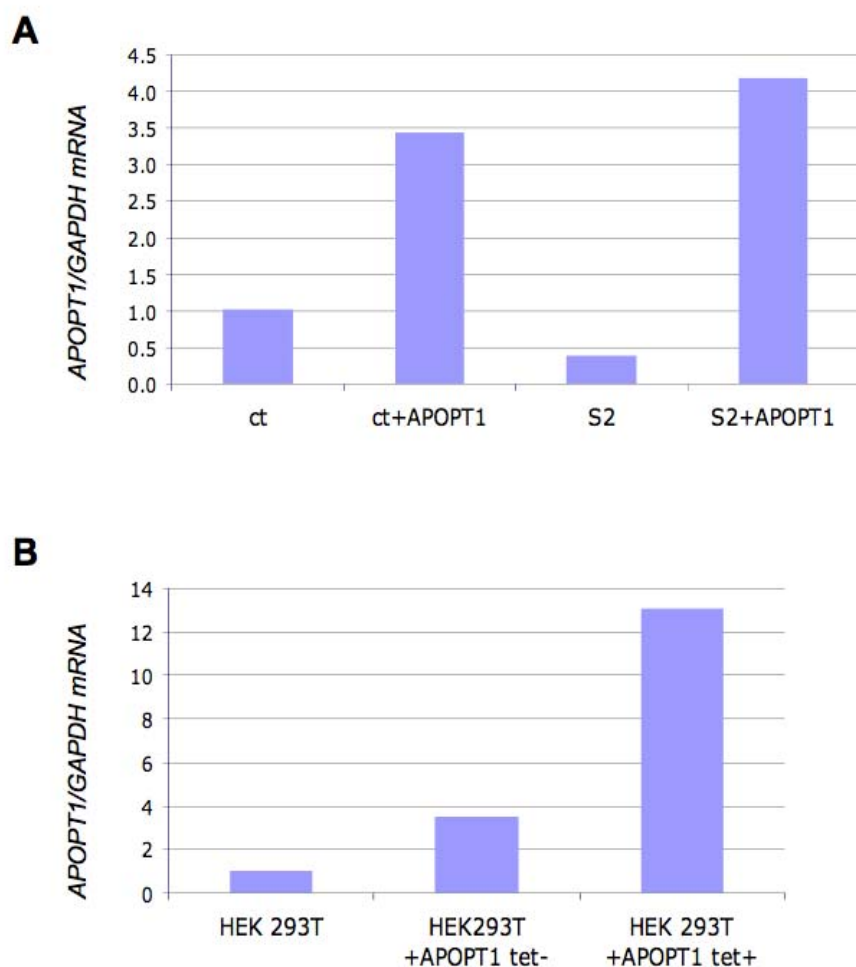

Figure S7

**Figure S7. Expression of *APOPT1* in transduced/transfected cell lines**

Panel A. Quantitative PCR analysis of *APOPT1* transcript in immortalized fibroblasts from subject 2 (S2) and a control individual (Ct), in basal conditions or stably transduced with *APOPT1-HA* (+APOPT1). The values of *APOPT1* transcript were normalized to *GAPDH*.

Panel B. Quantitative PCR analysis of *APOPT1* transcript in untreated HEK293T cells or in cells transfected with a Tet on-off inducible vector, expressing the *APOPT1-HA* transcript (+APOPT1), grown either without (tet-) or with 1 µg/ml doxycycline (tet+).



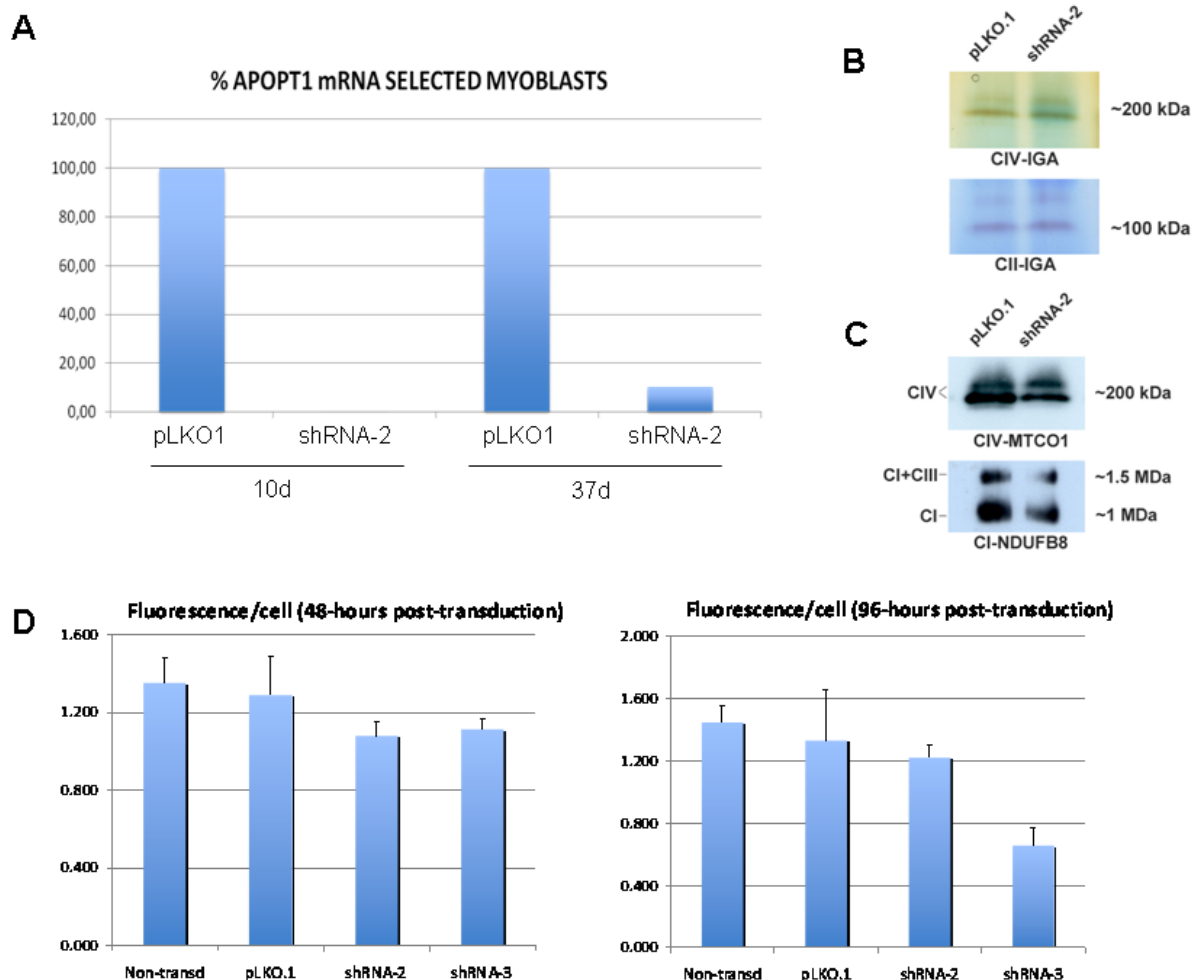

Figure S8

**Figure S8. shRNA knockdown of APOPT1 mRNA**

Panel A. Quantitative PCR analysis of *APOPT1* transcript in myoblasts transduced with the “empty” vector pLKO.1, and with *APOPT1* specific shRNA-2. 10d: RNA extracted 10 days post-infection; 37d: 37 days post-infection.

Panel B. In-gel Activity (IGA) for complex IV (CIV) and II (CII) in myoblasts transduced with the “empty” vector pLKO.1 and with *APOPT1* specific shRNA-2. Samples were taken at 37 days post-infection and solubilized with 1% dodecylmaltoside.

Panel C. Western-blot analysis of one-dimension BNGE in myoblasts transduced with the “empty” vector pLKO.1 and with *APOPT1* specific shRNA-2. Samples were taken at 37 days post-infection and solubilized with 1% dodecylmaltoside. We used an antibody against MTCO1 for complex IV (CIV) and an antibody against NDUFB8 to detect complex I (I).

Panel D. ROS detection by dichlorofluorescein (DCHF, Invitrogen) fluorescence on naïve, non-transduced immortalized fibroblasts, fibroblasts transduced with the “empty” vector pLKO.1, and with *APOPT1* specific shRNA-2 and shRNA-3, under exposure to 100uM H<sub>2</sub>O<sub>2</sub>. Bars represent standard deviations.

**Table S1 MRI findings**

| Subject                                                               | S1                     | S2                     | S3                                                                         | S4                                                                        | S5                                                                        | S6                                                                         |
|-----------------------------------------------------------------------|------------------------|------------------------|----------------------------------------------------------------------------|---------------------------------------------------------------------------|---------------------------------------------------------------------------|----------------------------------------------------------------------------|
| Age early MRI (years)                                                 | no early MRI available | no early MRI available | 4                                                                          | 5                                                                         | 5                                                                         | 3                                                                          |
| Cerebral WM abn. - frontal<br>- parietal<br>- occipital<br>- temporal |                        |                        | small lesions in frontal and temporal WM, severe abn. parieto-occipital WM | lesions in R frontal periventricular WM, severe abn. parieto-occipital WM | tiny lesions in frontal and temporal WM, severe abn. parieto-occipital WM | small lesions in frontal and temporal WM, severe abn. parieto-occipital WM |
| Predominant location WM abn. - lobe<br>- zone                         |                        |                        | parieto-occipital, periventricular and deep WM                             | parieto-occipital, periventricular and deep WM                            | parieto-occipital, periventricular and deep WM                            | parieto-occipital, periventricular and deep WM                             |
| Cysts in abnormal WM                                                  |                        |                        | countless                                                                  | countless                                                                 | countless                                                                 | countless                                                                  |
| Corpus callosum abn.- genu<br>- body<br>- splenium                    |                        |                        | entire corpus callosum affected, posterior part most severely              | posterior half of corpus callosum severely affected, anterior half spared | tiny lesion in genu; splenium and posterior part body severely affected   | one lesion in genu, splenium severely affected, middle segment spared      |
| Internal capsule abn. - anterior<br>- posterior                       |                        |                        | only posterior limb                                                        | only posterior limb                                                       | only posterior limb                                                       | only posterior limb                                                        |
| Aspect WM abnormalities                                               |                        |                        | inhomogeneous, confluent and multifocal                                    | inhomogeneous, confluent and multifocal                                   | inhomogeneous, confluent and multifocal                                   | inhomogeneous, confluent                                                   |
| Abn. cerebral cortex, basal nuclei, thalami                           |                        |                        | -                                                                          | -                                                                         | -                                                                         | -                                                                          |
| Enlargement lateral ventricles                                        |                        |                        | mild                                                                       | -                                                                         | -                                                                         | -                                                                          |
| Enlargement subarachnoid spaces                                       |                        |                        | -                                                                          | -                                                                         | -                                                                         | -                                                                          |
| Abn. cerebellar WM and peduncles                                      |                        |                        | -                                                                          | -                                                                         | -                                                                         | -                                                                          |
| Abn. cerebellar cortex, dentate nucleus                               |                        |                        | -                                                                          | -                                                                         | -                                                                         | -                                                                          |
| Cerebellar atrophy                                                    |                        |                        | -                                                                          | -                                                                         | -                                                                         | -                                                                          |
| Abn. midbrain                                                         |                        |                        | -                                                                          | -                                                                         | parieto-occipito-pontine tracts                                           | parieto-occipito-pontine tracts                                            |
| Abn. pons                                                             |                        |                        | -                                                                          | -                                                                         | -                                                                         | -                                                                          |
| Abn. Medulla                                                          |                        |                        | -                                                                          | pyramids                                                                  | -                                                                         | -                                                                          |
| Contrast enhancement                                                  |                        |                        | in multiple foci of abnormal WM                                            | in multiple foci of abnormal WM                                           | in multifocal areas of abnormal WM                                        | no evident enhancement                                                     |
| Restricted diffusion                                                  |                        |                        | not investigated                                                           | in multifocal areas of abnormal WM                                        | in multifocal areas of abnormal WM                                        | in multifocal areas of abnormal WM                                         |
| MRS lactate                                                           |                        |                        | highly elevated in abnormal WM                                             | highly elevated in abnormal WM                                            | not investigated                                                          | highly elevated in abnormal WM                                             |

| Subject                                                               | S1                                                         | S2                                             | S3                                                                      | S4                                                                                                | S5               | S6               |
|-----------------------------------------------------------------------|------------------------------------------------------------|------------------------------------------------|-------------------------------------------------------------------------|---------------------------------------------------------------------------------------------------|------------------|------------------|
| Age at follow-up MRI (years)                                          | 21                                                         | 15                                             | 10                                                                      | 9½                                                                                                | no follow-up MRI | no follow-up MRI |
| Cerebral WM abn. - frontal<br>- parietal<br>- occipital<br>- temporal | all cerebral WM highly atrophic and abn. signal throughout | only signal abn. in parieto-occipital WM       | abn. signal throughout, but most severe in parieto-occipital WM         | lesion in R frontal periventricular WM, severe abn. parieto-occipital WM                          |                  |                  |
| Predominant location WM abn.<br>- lobe<br>- zone                      | no predominance                                            | parieto-occipital, periventricular and deep WM | parieto-occipital, periventricular and deep WM                          | parieto-occipital, periventricular and deep WM                                                    |                  |                  |
| WM cysts                                                              | multiple small cysts                                       | multiple small cysts                           | countless, but partially collapsed                                      | countless, but partially collapsed                                                                |                  |                  |
| Corpus callosum abn.- genu<br>- body<br>- splenium                    | highly atrophic and abn. in signal throughout              | only lesion in splenium                        | affected throughout and highly atrophic                                 | posterior half of corpus callosum affected, anterior half spared                                  |                  |                  |
| Internal capsule abn. - anterior<br>- posterior                       | only posterior limb                                        | -                                              | only posterior limb                                                     | only posterior limb                                                                               |                  |                  |
| Aspect WM abnormalities                                               | confluent                                                  | confluent                                      | inhomogeneous, confluent                                                | inhomogeneous, confluent, multifocal                                                              |                  |                  |
| Abn. cerebral cortex, basal nuclei, thalami                           | -                                                          | -                                              | -                                                                       | -                                                                                                 |                  |                  |
| Enlargement lateral ventricles                                        | severe                                                     | -                                              | mild                                                                    | mild                                                                                              |                  |                  |
| Enlargement subarachnoid spaces                                       | mild                                                       | -                                              | slight                                                                  | -                                                                                                 |                  |                  |
| Abn. cerebellar WM and peduncles                                      | subcortical cerebellar WM                                  | -                                              | -                                                                       | -                                                                                                 |                  |                  |
| Abn. cerebellar cortex, dentate nucleus                               | -                                                          | -                                              | -                                                                       | -                                                                                                 |                  |                  |
| Cerebellar atrophy                                                    | +                                                          | -                                              | -                                                                       | -                                                                                                 |                  |                  |
| Abn. midbrain                                                         | pyramidal tracts                                           | -                                              | pyramidal and parieto-occipito-pontine tracts                           | pyramidal and parieto-occipito-pontine tracts                                                     |                  |                  |
| Abn. pons                                                             | -                                                          | -                                              | -                                                                       | -                                                                                                 |                  |                  |
| Abn. Medulla                                                          | -                                                          | -                                              | -                                                                       | pyramids                                                                                          |                  |                  |
| Contrast enhancement                                                  | not investigated                                           | not investigated                               | not investigated                                                        | not investigated                                                                                  |                  |                  |
| Restricted diffusion                                                  | not investigated                                           | not investigated                               | not investigated                                                        | -                                                                                                 |                  |                  |
| MRS lactate                                                           | elevated                                                   | not elevated                                   | elevated                                                                | not elevated                                                                                      |                  |                  |
| Change over time                                                      |                                                            |                                                | stabilization and atrophy of abn. areas, collapse of cysts, no new abn. | stabilization and atrophy of abn. areas, collapse of cysts, no new abn., normalization of lactate |                  |                  |

WM, white matter; abn., abnormal/abnormality/abnormalities; -, absent
